# Supplementary material for: Hepatitis A virus infections, immunisations and demographic determinants in children and adolescents, Germany
Source: PubMed Central journal article supplement (PMC6232152; doi:10.1038/s41598-018-34927-1), 2018-11-12
Supplement: 41598_2018_34927_MOESM1_ESM.pdf [file 41598_2018_34927_MOESM1_ESM.pdf]

## **Hepatitis A virus infections, immunisations and demographic determinants in children and adolescents, Germany.**

Kai Michaelis <sup>1\*</sup>, Christina Poethko-Müller <sup>2</sup>, Ronny Kuhnert <sup>2</sup>, Klaus Stark <sup>1</sup>, and Mirko Faber <sup>1</sup>

<sup>1</sup> Department for Infectious Disease Epidemiology, Unit of Gastrointestinal Infections, Zoonoses, and Tropical Infections, Robert Koch Institute (RKI), D-13353 Berlin, Germany

<sup>2</sup> Department of Epidemiology and Health Monitoring, Robert Koch Institute (RKI), D-12101 Berlin, Germany

\* Correspondence: K Michaelis

E-mail: MichaelisK@rki.de

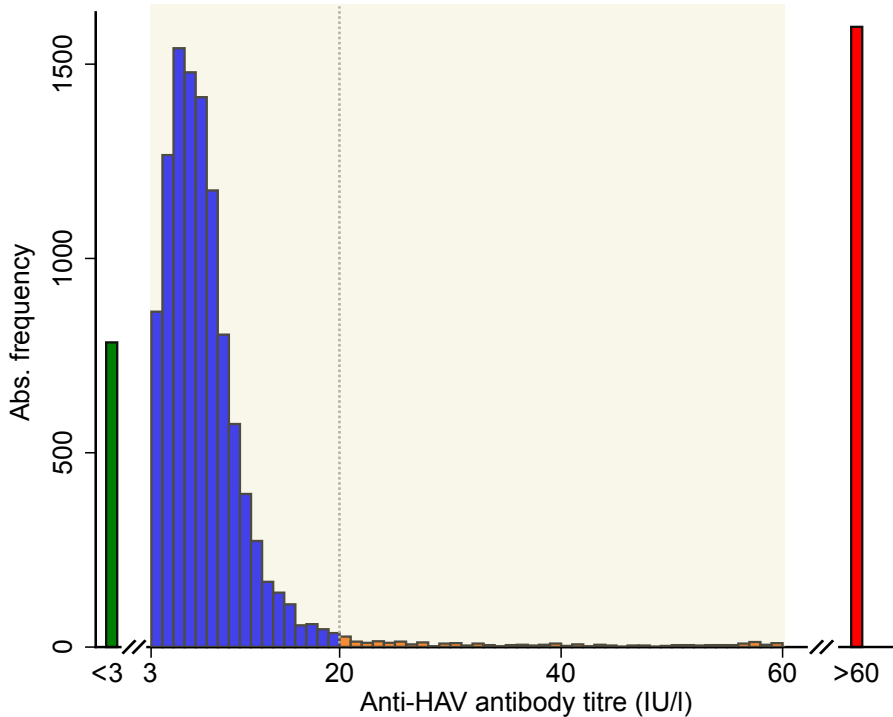

**Figure S1. Histogram of anti-HAV immunoassay test results in study participants (German children and adolescents, aged 3-17 years, n=13,063). The dashed line differentiates seronegative (<20.0 IU/L) from seropositive ( $\geq$ 20.0 IU/L) samples, respectively. The darker background depicts the linear detection range of the immunoassay (range 3-60 IU/L).**

Of the 13,063 samples tested for anti-HAV antibodies 784 (6%) were seronegative and below the detection limit (<3 IU/L, green), 10,399 (80%) above the detection limit but also seronegative (range 3- <20 IU/L, blue), 284 (2%) seropositive, within linear detection range (20-60 IU/L, orange) and 1,596 (12%) seropositive, above the linear detection range (>60 IU/L, red) of the immunoassay, respectively (figure S1). Of all 1,880 seropositive tested samples 1,395 (74%) were vaccinated against hepatitis A, 360 (19%) were not vaccinated but seropositive, and 125 (7%) had an unknown vaccination status.

**Table S1. Numerical values of the estimated (weighted) overall HAV-seroprevalence in German children and adolescents by age (n=13,063). These results are also depicted in figure 2 in the main text.**

| <b>Age (years)</b> | <b>HAV-seropositive (%)</b> | <b>95% CI</b> |
|--------------------|-----------------------------|---------------|
| 0                  | n.d.                        | -             |
| 1                  | n.d.                        | -             |
| 2                  | n.d.                        | -             |
| 3                  | 4.97                        | 2.99-6.95     |
| 4                  | 6.17                        | 4.23-8.11     |
| 5                  | 8.66                        | 6.05-11.26    |
| 6                  | 7.20                        | 5.12-9.27     |
| 7                  | 7.70                        | 5.40-10.01    |
| 8                  | 8.87                        | 6.58-11.17    |
| 9                  | 9.64                        | 7.53-11.74    |
| 10                 | 12.73                       | 10.52-14.93   |
| 11                 | 12.95                       | 10.46-15.43   |
| 12                 | 16.11                       | 13.26-18.96   |
| 13                 | 16.03                       | 13.00-19.07   |
| 14                 | 15.71                       | 12.61-18.82   |
| 15                 | 19.65                       | 16.14-23.16   |
| 16                 | 20.98                       | 17.83-24.13   |
| 17                 | 20.12                       | 16.81-23.43   |
